# Supplementary material
Source: publisher figshare collection journal article supplement (https://acs.figshare.com/ndownloader/files/11065253)
Supplement: Supplementary file 1 [file 11065253]

## Supplementary Material

### Magnetism Control by Doping in $\text{LaAlO}_3/\text{SrTiO}_3$ Heterointerfaces

Hong Yan, Zhaoting Zhang, Shuanhu Wang, Xiangyang Wei, Changle Chen and Kexin Jin\*

Shaanxi Key Laboratory of Condensed Matter Structures and Properties, School of Science,  
Northwestern Polytechnical University, Xi'an 710072, China

The films of LAO and LARO ( $R=\text{Fe, Co, Ni and Cu}$ ) were deposited on the  $\text{TiO}_2$ -terminated  $\text{SrTiO}_3$  (STO) substrates using the pulsed laser deposition method. The surface morphology of heterointerfaces shows a flat terrace-like surface, as shown in Figure S1-S3. The Hall measurements for all interfaces have been performed at several temperatures as shown in Figure S4. The temperature dependences of the magnetization of  $\text{LACoO}$  and  $\text{LANiO}$  heterointerfaces are measured with increasing temperature and an applied field of 4 T as shown in Figure S5. There is no magnetic signal observed for LAO and  $\text{LACuO}$  thin films (Figure S6). The resistances of heterointerfaces under the irradiation decrease at different temperatures and cannot restore their originating values (Figure S7-S11). The fitting results of the time constant  $\tau_1$  for the decay process are shown in Figure S12.

---

\* Author to whom correspondence should be addressed; electronic-mail: [jinkx@nwpu.edu.cn](mailto:jinkx@nwpu.edu.cn)

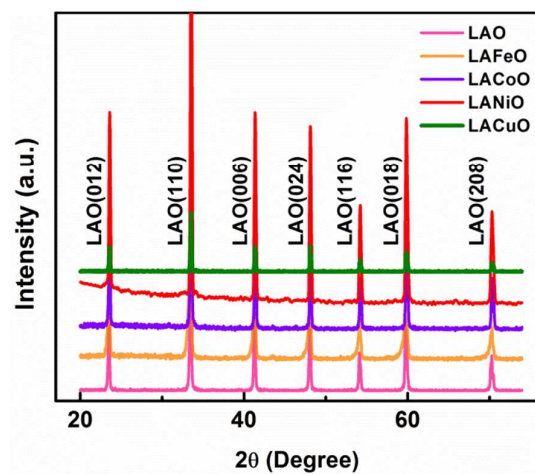

**Figure S1.** X-ray diffraction pattern of the LAO and LARO ( $R=\text{Fe, Co, Ni and Cu}$ ) targets.

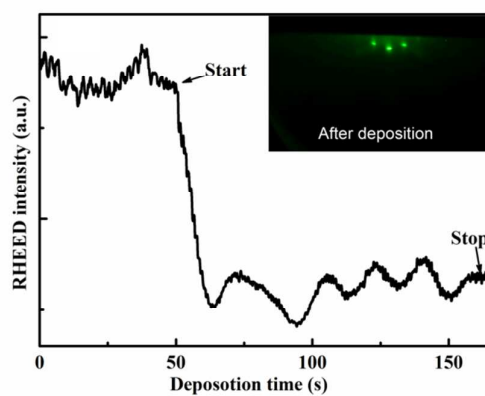

**Figure S2.** RHEED intensity oscillations recorded along the (001) crystallographic direction during the fabrication of 5 u.c. LAO/STO.

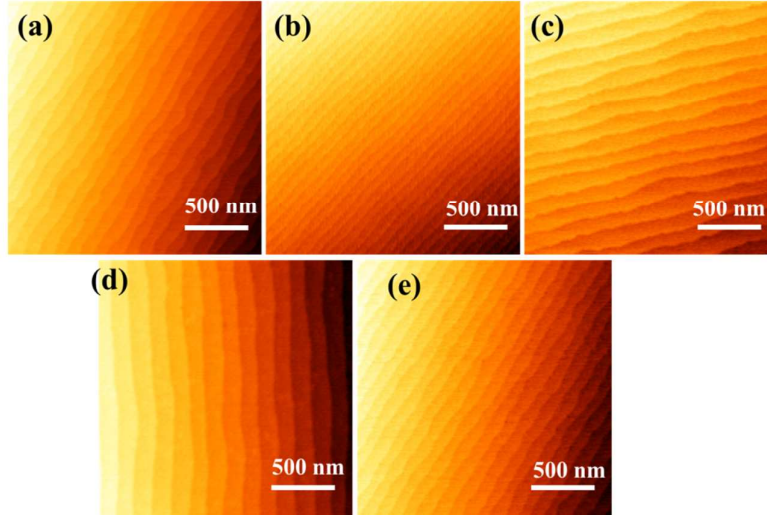

**Figure S3.** (a), (b), (c), (d) and (e) AFM images of LAO and LARO ( $R = \text{Fe, Co, Ni, Cu}$ ) films on STO substrates. The images show a flat terrace-like surface. The scale bar is 500 nm.

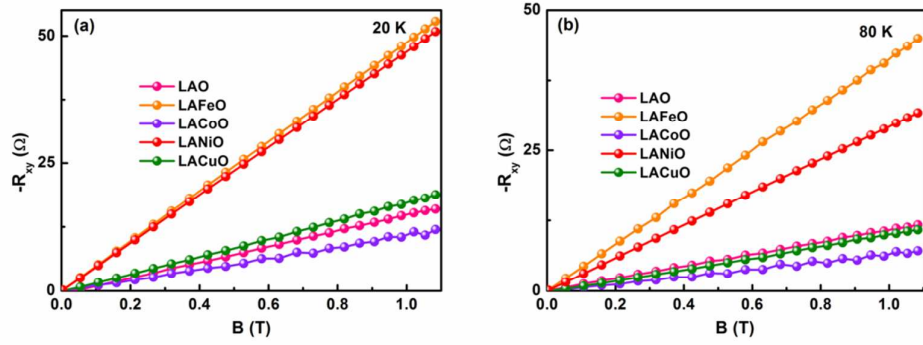

**Figure S4.** Hall resistance of LAO and LARO ( $R = \text{Fe, Co, Ni and Cu}$ ) samples as a function of magnetic field at 20 K (a) and 80 K (b) in darkness.

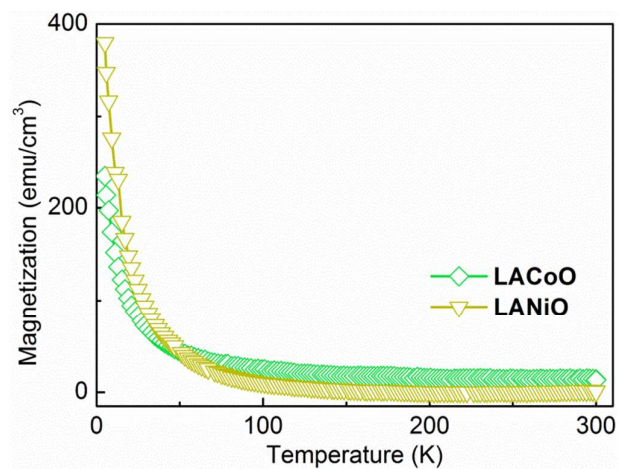

**Figure S5.** Magnetization measurements at  $H = 4$  T as a function of temperature for LACoO and LANiO thin films.

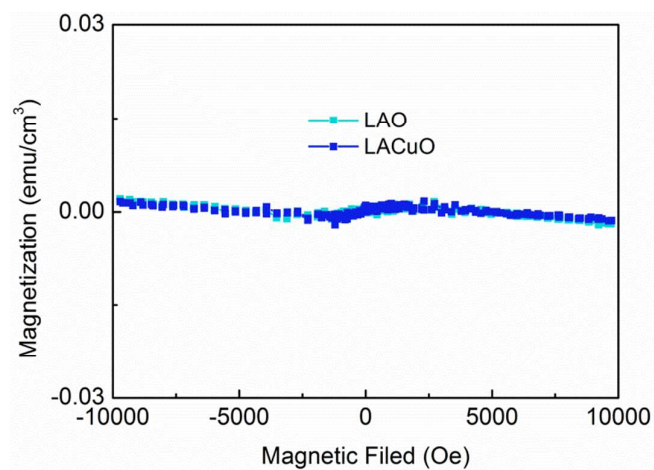

**Figure S6.** Magnetization measurements measured at 10 K as a function of magnetic field for LAO and LACuO thin films. There is no magnetic signal observed.

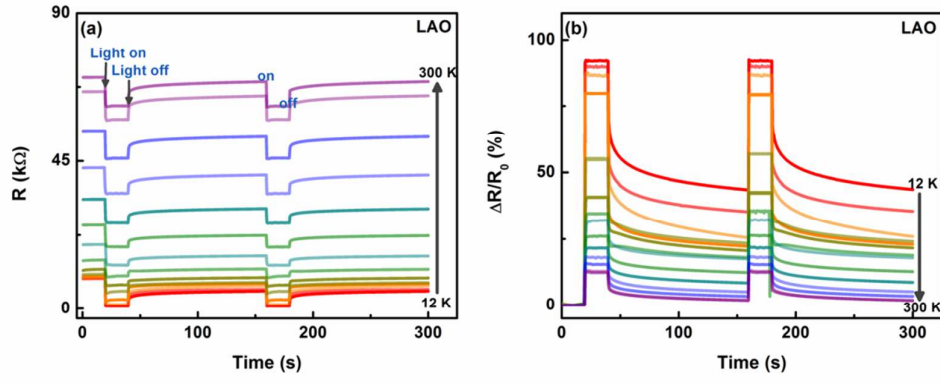

**Figure S7.** Time evolution of the resistance (a) and the normalized resistance  $\Delta R/R_0$  (b) at LAO/STO heterointerfaces under the irradiation of light at different temperatures.

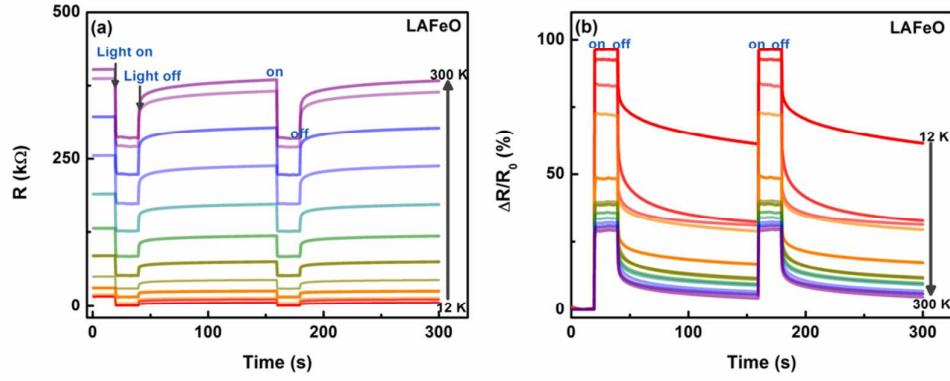

**Figure S8.** Time evolution of the resistance (a) and the normalized resistance  $\Delta R/R_0$  (b) at LAFEO/STO heterointerfaces under the irradiation of light at different temperatures.

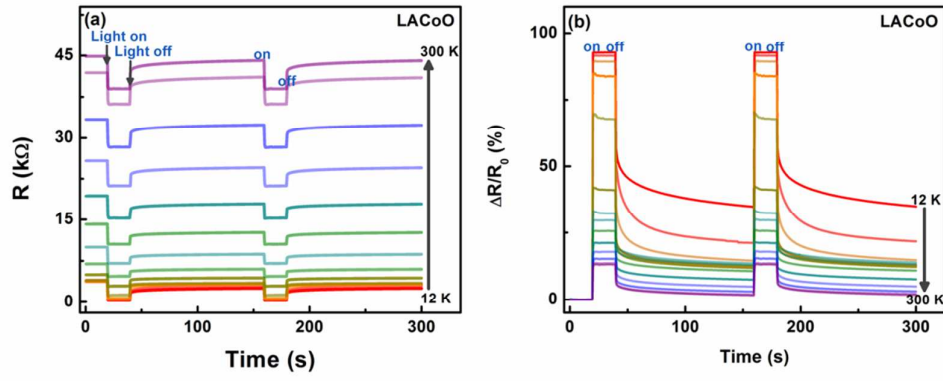

**Figure S9.** Time evolution of the resistance (a) and the normalized resistance  $\Delta R/R_0$  (b) at LACoO/STO heterointerfaces under the irradiation of light at different temperatures.

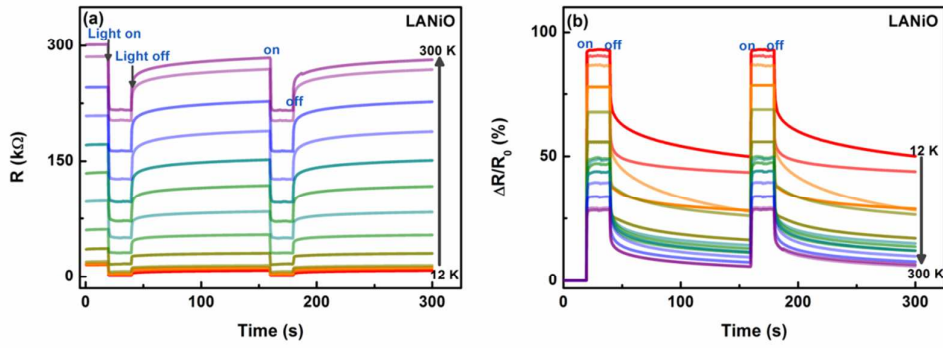

**Figure S10.** Time evolution of the resistance (a) and the normalized resistance  $\Delta R/R_0$  (b) at LANiO/STO heterointerfaces under the irradiation of light at different temperatures.

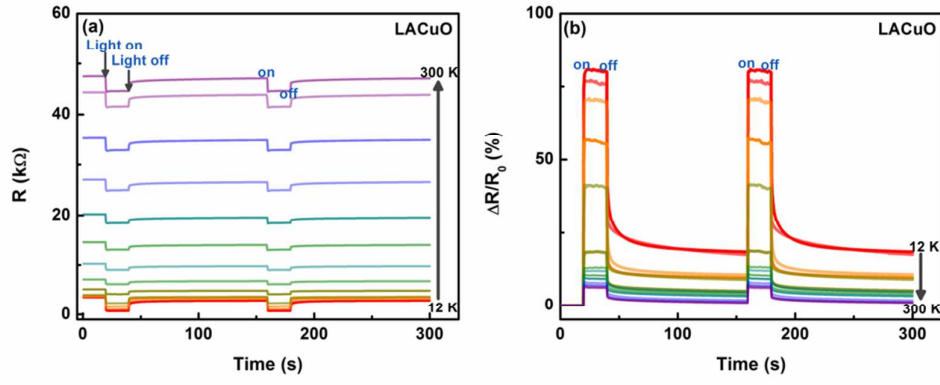

**Figure S11.** Time evolution of the resistance (a) and the normalized resistance  $\Delta R/R_0$  (b) at LACuO/STO heterointerfaces under the irradiation of light at different temperatures.

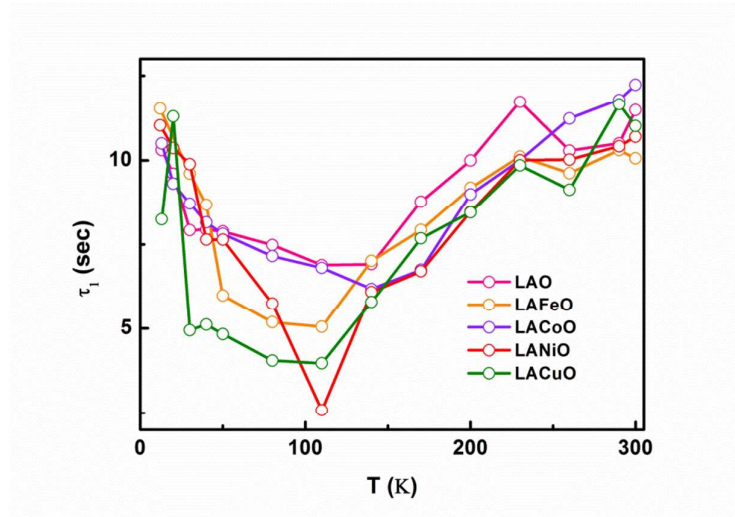

**Figure S12.** The time constant  $\tau_1$  as a function of temperature.
